# Supplementary material
Source: PubMed Central journal article supplement (PMC2614785)
Supplement: 0810305105_0810305105SI.pdf [file 0810305105_0810305105SI.pdf]

# Supporting Information

Konstantinov et al. 10.1073/pnas.0810305105

## SI Text

### Materials and Methods

**Extraction and Purification of Surface Layer Proteins.** One hundred milliliters of overnight *Lactobacillus acidophilus* NCFM and *L. acidophilus* NCK1377-CI were centrifuged ( $8,000 \times g$  for 20 min at  $4^\circ\text{C}$ ) followed by washing once with cold distilled water. The pellets were suspended in 5 M LiCl at  $4^\circ\text{C}$  (1 mL of LiCl, 10 mg of biomass) followed by slight stirring for 15 min. Supernatant ( $\approx 60$  mL) was harvested after centrifugation. Dialysis of the supernatant against distilled water was conducted in a  $4^\circ\text{C}$  cold room with frequent changes of the water during the first 4 h of dialysis for the total duration of dialysis of 24 h. During dialysis, a white precipitate appears that is characteristic of reassociated insoluble paracrystalline S layers. The precipitate was harvested by centrifugation ( $40,000 \times g$  for 20 min at  $4^\circ\text{C}$ ). The pellet of the corresponding S layers was then resuspended and stirred in 1 M LiCl for 15 min at  $4^\circ\text{C}$  (10 mL of LiCl per pellet) followed by centrifugation to  $40,000 \times g$  for 20 min at  $4^\circ\text{C}$ . Each pellet (pure S layer) was washed by 15 mL of cold sterile distilled water and stored at  $-20^\circ\text{C}$  before further use.

**Dendritic Cell (DC)-Driven Th1/Th2 Differentiation.** Immature DCs (iDCs) were cultured from monocytes of healthy donors in Iscove's Modified Dulbecco's Medium (GIBCO), supplemented with 10% FCS (BioWithaker), 500 units/mL IL-4, and 800 units/mL GM-CSF (Biosource). At day 6, DC maturation was induced with varying concentrations of *L. acidophilus* NCFM cells, NCK1377-CI cells, or purified S layer proteins from NCFM (SlpA-dominant) at a concentration  $1 \mu\text{g/mL}$  and both with and without LPS ( $10 \text{ ng/mL}$ ). The following positive controls were included in the assay: (i)  $10 \text{ ng/mL}$  *Escherichia coli* LPS (mixed Th1/Th2 response) and (ii)  $10 \mu\text{g/mL}$  PGE2 and  $10 \text{ ng/mL}$  LPS (Th2). After 2 days, DCs were washed and incubated with autologous  $\text{CD45RA}^+/\text{CD4}^+$  T cells ( $5 \times 10^3$  DC/ $20 \times 10^3$  T cells). In parallel, DCs were analyzed for expression of CD86 maturation marker (BD PharMingen) by flow cytometry. At day 5, recombinant IL-2 ( $10 \text{ units/mL}$ ) was added, and the cultures were expanded for the next 7 days. To determine cytokine

production by Th cells, at day 12–15 quiescent T cells were restimulated with  $10 \text{ ng/mL}$  phorbol 12-myristate 13-acetate and  $1 \mu\text{g/mL}$  ionomycin (both Sigma-Aldrich) for 6 h. After 1 h,  $10 \mu\text{g/mL}$  Brefeldin A (Sigma-Aldrich) was added to the T cells. Single-cell production of IL-4 and IFN $\gamma$  was determined by intracellular flow cytometric analysis. Cells were fixed in 2% paraformaldehyde, permeabilized with 0.5% saponin (Sigma-Aldrich) and stained with anti-human IFN $\gamma$ -FITC and anti-human IL-4-phycoerythrin (BD PharMingen).

**DC Binding by Bacteria.** *L. acidophilus* NCFM and NCK1377-CI cells ( $\approx 1 \times 10^9$  cfu/mL) were labeled by incubation with FITC ( $0.5 \text{ mg/mL}$ ) in PBS for 1 h at room temperature. The FITC-labeled bacteria were washed 3 times to remove unbound FITC. Immature DCs, CHO, or CHO-DC-SIGN cells ( $5 \times 10^4$ ) were preincubated with neutralizing antibody to DC-SIGN (AZN-D1), or EDTA ( $10 \text{ mM}$ ) in TSM buffer [ $20 \text{ mM}$  Tris,  $150 \text{ mM}$  NaCl,  $1 \text{ mM}$   $\text{CaCl}_2$ , and  $2 \text{ mM}$   $\text{MgCl}_2$  (pH 8.0)] plus 0.5% BSA for 10 min at room temperature. Thereafter, the FITC-labeled bacteria (bacteria:cell ratios of 1,000:1 to 1:10) were added and incubated for 45 min at  $37^\circ\text{C}$ . After washing, the cells were analyzed by means of flow cytometry and gated for large cells in the forward scatter/side scatter, excluding unbound bacteria, and using FACScan analysis software (Becton and Dickinson).

**Fluorescent Microscope.** *L. acidophilus* NCFM (SlpA-dominant) and NCK1377-CI, the SlpA-knockout mutant (SlpB-dominant), were labeled with FITC as described above. DCs were incubated with the 2 bacteria for 45 min at  $37^\circ\text{C}$ , spotted onto poly(L)-lysine-coated glass slides, and stained in red color by incubation with 4-di-10-ASP (DiA; Molecular Probes). The image analysis was performed on a Nikon Eclipse E800 fluorescent microscope.

**Statistics.** Data are expressed as means  $\pm$  SD. Data were analyzed for statistical significance by using ANOVA followed by an unpaired Student's *t* test to compare either different groups of multiple datasets or just 2 sets of data or variables between 2 groups, respectively. A *P* value of  $<0.05$  was considered to be significant.

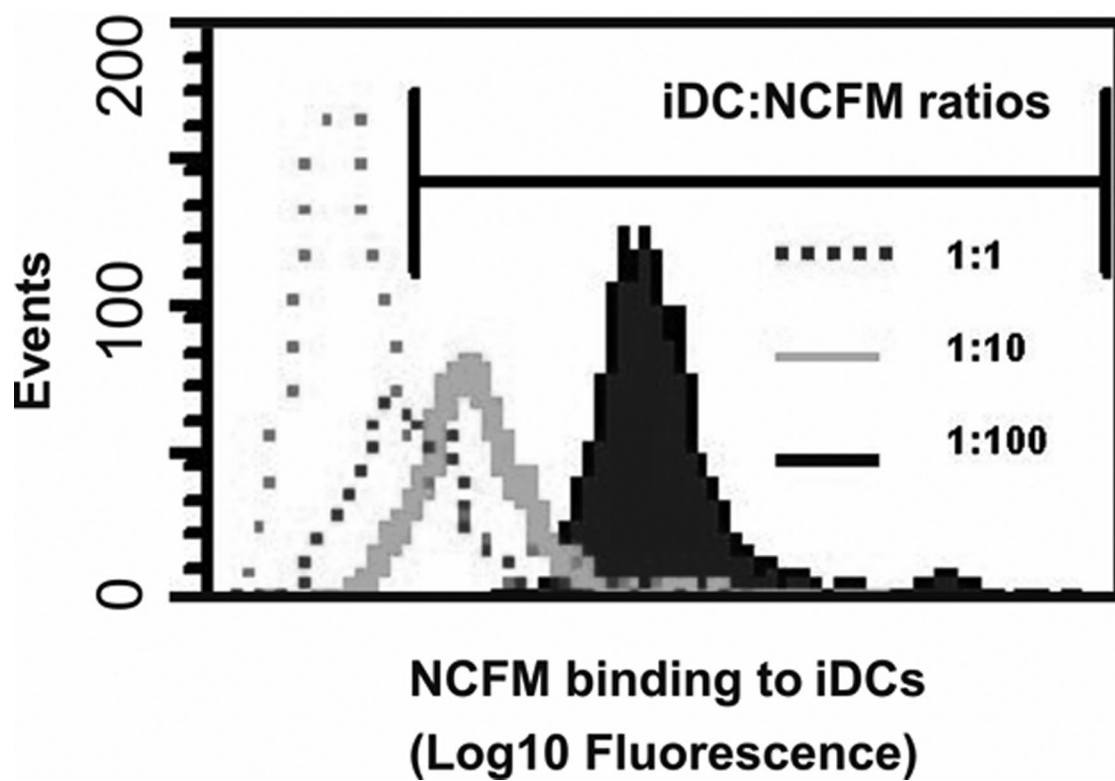

**Fig. S1.** *L. acidophilus* NCFM binding to iDCs is concentrations-dependent. The ligation of *L. acidophilus* NCFM to iDCs at different ratios was analyzed by FACSscan ([SI Materials and Methods](#)).

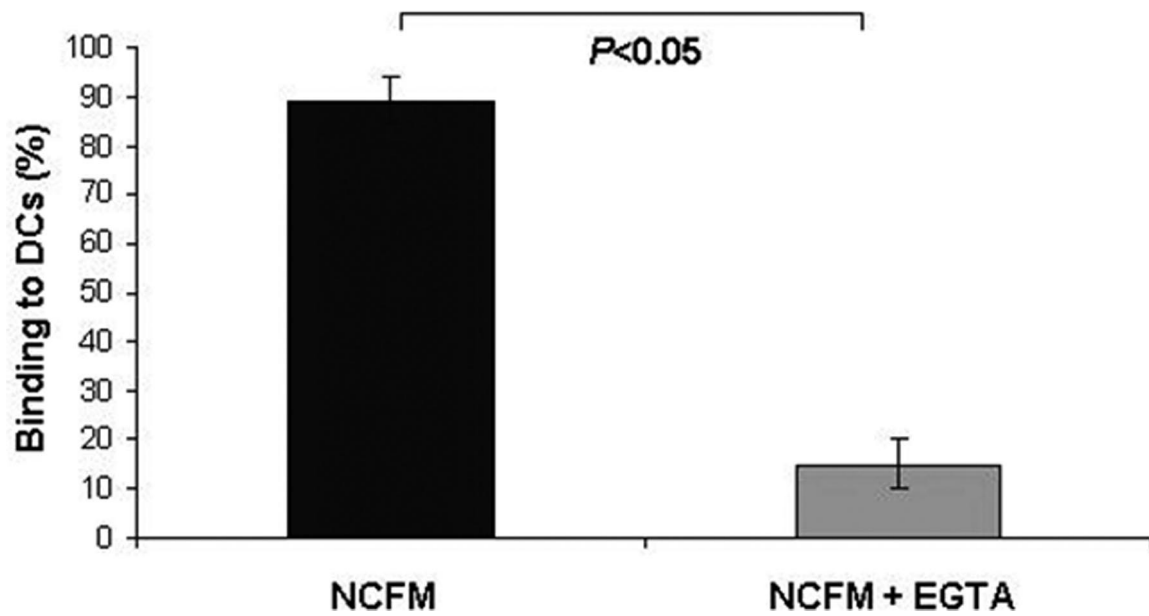

**Fig. S2.** Involvement of C-type lectin receptors (CLRs) in the binding of *L. acidophilus* NCFM binding to iDCs. iDCs ( $5 \times 10^4$  cells) were treated with FITC-labeled *L. acidophilus* NCFM. The impact of CLRs was determined when iDCs were incubated with *L. acidophilus* NCFM or *L. acidophilus* NCFM in the presence of EGTA and calculating the percentage of the DCs binding to the bacteria by FACS. Experiments were repeated at least 3 times.

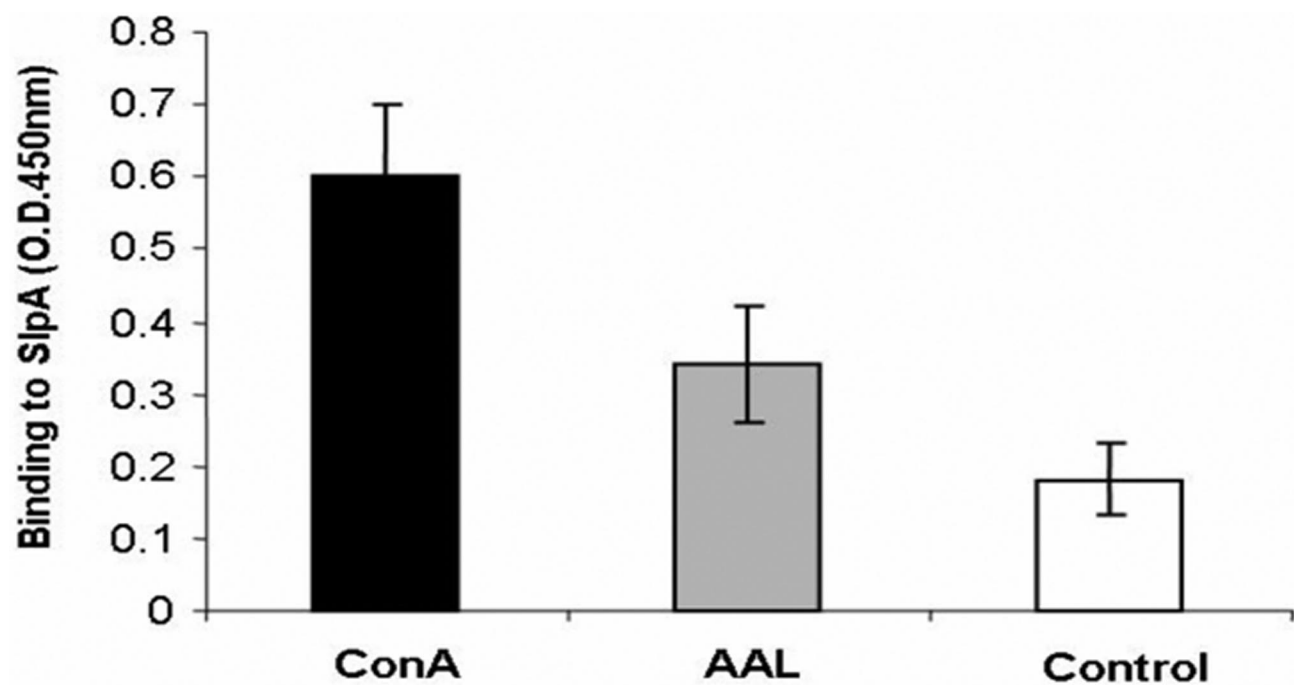

**Fig. S3.** Putative glycosylation of the purified SlpA demonstrated by plant lectins. Plant lectins, ConA, and aleuria aurantia lectin (AAL), differentially recognize SlpA of *L. acidophilus* NCFM, as assayed by ELISA, mean  $\pm$  SD.

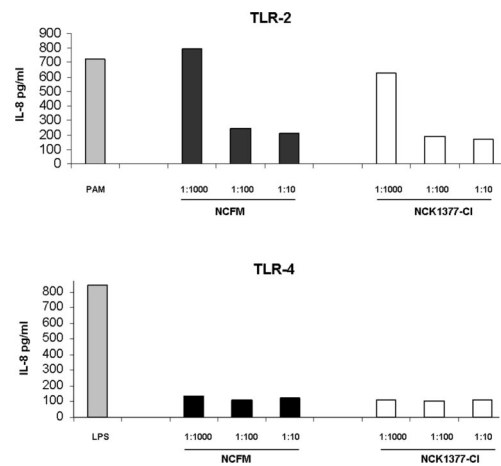

**Fig. S4.** *L. acidophilus* NCFM (SlpA<sup>+</sup>) and NCK1377-CI (SlpB<sup>+</sup>) activate Toll-like receptor (TLR)2 at similar levels. HEK-293 cell line transfected with TLR2 or TLR4 was incubated with TLR2 agonist PAM3CSK (PAM), TLR4 agonist LPS, or with NCFM and NCK1377-CI at different ratios (1:1,000, 100:1, 1:10; HEK-TLR2 or 4:bacteria). Representative experiments for TLR2 or TLR4 activation are shown separately.

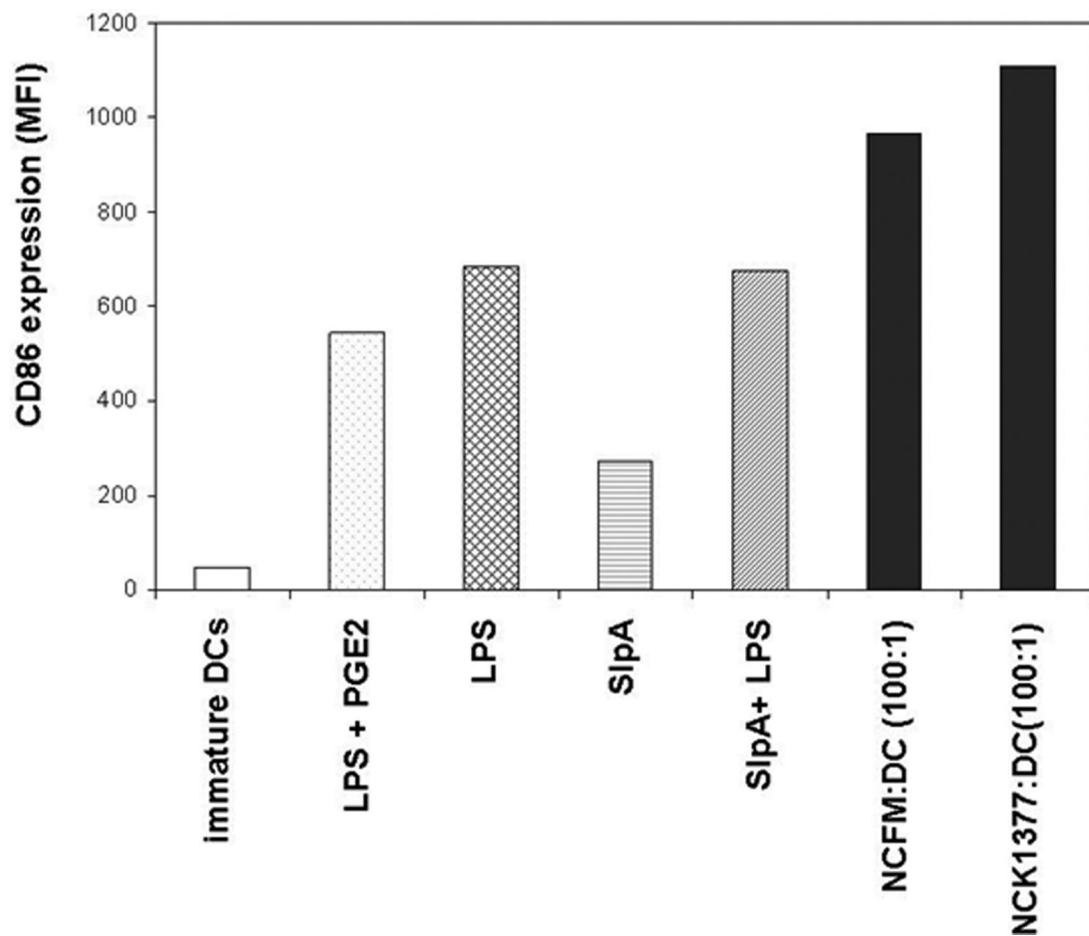

**Fig. S5.** *L. acidophilus* NCFM (SlpA<sup>+</sup>) and NCK1377-CI (SlpB<sup>+</sup>) stimulate maturation of DCs through expression of CD86. FACSscan analysis of maturation markers CD86 after *L. acidophilus* NCFM, NCK1377-CI, purified SlpA + LPS or purified SlpA (1  $\mu$ g/mL) treatment of iDCs is shown. A representative analysis is presented of the iDC maturation after incubation with *L. acidophilus* NCFM cells (100 cfu per iDC), LPS, LPS + PGE<sub>2</sub> or left untreated (immature DCs) for 2 days. Afterward, iDCs were harvested, washed extensively with PBA, stained with specific Abs for 1 h at 4 °C, and analyzed by FACS. Experiments were repeated 3 times, and the values are average  $\pm$  SD. MFI, mean fluorescence intensity.

**Table S1. *L. acidophilus* NCFM strains used in this work**

| <i>L. acidophilus</i> strains | Origin                                                 | Ref. |
|-------------------------------|--------------------------------------------------------|------|
| NCFM                          | Human intestinal isolate                               | 1    |
| NCK1377-CI                    | Knockout in the S layer protein A ( <i>slpA</i> ) gene | 2    |
| NCK1398                       | Knockout of <i>lacL</i> gene ( $\beta$ -galactosidase) | 3    |
| NCK1660                       | Knockout of Mub, putative mucin-binding protein        | 2    |
| NCK1661                       | Knockout of FbpA, putative fibronectin-binding protein | 2    |
| NCK166                        | Knockout of R28, putative adhesion protein             | 2    |

1. Sanders ME, Klaenhammer TR (2001) Invited review: The scientific basis of *Lactobacillus acidophilus* NCFM functionality as a probiotic. *J Dairy Sci* 84:319–331.
2. Buck BL, Altermann E, Svingerud T, Klaenhammer TR (2005) Functional analysis of putative adhesion factors in *Lactobacillus acidophilus* NCFM. *Appl Environ Microbiol* 71:8344–8351.
3. Russell WM, Klaenhammer TR (2001) Efficient system for directed integration into the *Lactobacillus acidophilus* and *Lactobacillus gasseri* chromosomes via homologous recombination. *Appl Environ Microbiol* 67:4361–4364.
